# Supplementary material for: Conditional deletion of neurexins dysregulates neurotransmission from dopamine neurons
Source: eLife. 2023 Jul 6;12:e87902. doi: 10.7554/eLife.87902 (PMC10409506; doi:10.7554/eLife.87902)
Supplement: Figure 1—source data 1. [file elife-87902-fig1-data1.xlsx]

## Sheet: Figure 1 (F)
Ducrot et al., 2023
eLife
Conditional deletion of neurexins dysregulates neurotransmission from dopamine neurons
Raw Data
																	Saline - KO
					RNA Seq values											E	Time (min)	mouse 1	mouse 2	mouse 3	mouse 4	mouse 5	mouse 6	mouse 7	mouse 8	mouse 9	mouse 10
				A		VTA 1	VTA 2	VTA 3	SNc 1	SNc 2	SNc 3						5	101.475	103.452	105.885	128.983	106.229	105.956	104.844	101.474	103.888	88.579
					Sox6	162.908	201.327	222.018	2957.41	2743.11	2886.54						10	99.6317	107.911	102.712	102.777	122.306	109.845	131.228	101.792	110.548	110.007
					Slc17a6	2095.65	1668.14	2096.37	562.076	653.693	543.892						15	86.6444	112.158	75.7852	99.55	66.3087	84.8049	69.9496	95.1289	101.626	98.8246
					Calbn1	9275.49	8367.32	7477.17	1875.54	1792.64	1705.54						20	112.249	76.4787	115.618	68.6892	105.156	99.3942	93.9784	101.605	83.9383	102.589
					Nrxn1	12494.2	12784.8	11560.4	10123.8	11359.4	10611.8						25	8.73633	18.3423	33.3357	33.3942	48.544	35.0814	47.8992	68.9064	46.0744	61.2463
					Nrxn2	12305.6	15581	12628.8	14183.8	14031.3	13898.8						30	42.5649	61.5922	51.6824	41.8826	44.7528	66.6775	48.1393	39.7023	61.4626	56.1522
					Nrxn3	7657.68	8433.36	7471.49	12833.4	13281.4	12456.3						35	93.539	52.5755	109.821	71.8397	38.378	66.1258	37.1116	67.8856	37.2406	67.3114
																	40	45.8566	75.757	96.7696	65.9965	32.3002	53.2144	23.188	61.5317	33.1309	80.3239
																	45	51.7552	67.0876	39.8512	45.7949	60.5745	99.0395	0	76.3563	51.8047	48.8041
					Latency to fall - WT												50	0.754268	75.9489	83.7653	87.1273	50.5751	33.5184	0	49.5704	44.1878	19.2714
				B	session	mouse 1	mouse 2	mouse 3	mouse 4	mouse 5	mouse 6	mouse 7	mouse 8				55	51.9322	31.3813	91.9808	71.077	53.1587	0.327684	43.6595	62.1599	11.1667	28.8917
					1	146	153	89	64	84	73	112	90				60	37.18	63.8054	71.48	31.2911	0	73.6501	58.0871	32.5088	30.6071	0.083142
					2	174	136	101	42	42	84	135	83
					3	193	171	37	71	181	132	123	63
					4	174	180	94	75	60	36	245	116				Saline - WT
					5	175	253	116	79	120	31	226	168				Time (min)	mouse 1	mouse 2	mouse 3	mouse 4	mouse 5	mouse 6	mouse 7	mouse 8	mouse 9	mouse 10
					6	211	182	156	117	140	60	199	117				5	90.8751	105.59	98.8737	87.8706	71.5466	105.226	103.057	80.7397	89.403	88.1635
					7	198	238	137	90	119	166	182	85				10	101.601	113.888	85.0807	93.9124	111.534	108.28	104.241	101.838	78.9025	127.038
					8	226	224	237	67	138	133	184	124				15	94.4628	92.6238	148.167	112.181	89.7106	68.0747	94.3181	107.978	144.642	93.7999
					9	217	211	245	80	140	128	202	186				20	113.061	87.8974	67.8781	106.036	127.209	118.419	98.3839	109.444	87.0525	90.9983
																	25	11.8093	59.7807	46.3547	109.924	48.9619	28.3243	84.2339	49.6074	102.239	31.9181
					Latency to fall - KO												30	36.6219	49.5879	108.344	93.1314	68.6609	21.5315	38.0429	76.7687	93.1963	76.2294
					session	mouse 1	mouse 2	mouse 3	mouse 4	mouse 5	mouse 6	mouse 7	mouse 8				35	78.6606	82.631	79.6537	74.3088	71.0643	75.5008	97.9183	92.7773	165.363	61.3241
					1	77	102	91	138	73	94	162	75				40	84.3045	55.0295	56.0388	166.127	83.9419	52.9005	48.1297	78.6612	118.717	66.8162
					2	123	292	81	168	140	177	118	37				45	49.641	51.6514	94.9365	116.407	83.7418	24.4357	78.1387	40.6187	130.102	10.954
					3	165	194	61	233	98	214	204	83				50	56.4257	55.5826	112.684	137.305	39.5571	10.2566	75.4025	64.6092	11.1416	50.7348
					4	72	163	53	289	79	98	125	80				55	19.0179	27.9281	40.9701	74.391	58.6358	20.2942	102.271	63.5755	33.6895	4.53743
					5	210	145	80	288	129	189	127	168				60	49.1639	26.0961	117.757	111.212	75.1346	38.3503	60.9268	39.5785	55.8043	16.3145
					6	184	130	89	300	205	187	258	235
					7	167	279	108	287	109	205	371	204
					8	179	176	105	285	194	186	275	120
					9	95	303	87	309	234	235	213	187
																	Cocaine - KO
																F	Time (min)	mouse 1	mouse 2	mouse 3	mouse 4	mouse 5	mouse 6	mouse 7	mouse 8
					Performance												5	90.427	107.432	84.4681	34.0165	93.5063	89.0686	61.965	106.607
				C	WT (S1)	WT (S9)	KO (S1)	KO (S9)									10	116.393	126.355	109.474	117.161	108.195	113.617	113.489	90.9712
					146	217	77	95									15	86.2894	90.0101	97.2138	126.919	96.8823	90.4751	122.098	103.693
					153	211	102	303									20	106.89	76.2031	108.844	121.903	101.417	106.84	102.448	98.7286
					89	245	91	87									25	377.587	234.757	231.683	52.5211	305.07	70.4342	143.9	178.485
					64	80	138	309									30	411.894	293.096	382.288	266.464	643.731	125.414	348.9	232.596
					84	140	73	234									35	526.982	345.21	519.74	339.688	704.505	199.361	386.628	271.919
					73	128	94	235									40	594.544	376.881	374.024	551.303	722.524	213.132	373.312	273.698
					112	202	162	213									45	618.122	463.743	161.981	513.305	727.451	158.454	299.521	273.071
					90	186	75	187									50	406.439	432.238	142.152	574.414	509.135	179.418	283.571	211.512
																	55	363.297	265.278	123.687	510.307	399.867	172.055	177.523	182.773
																	60	345.605	310.827	118.194	363.966	439.448	163.911	164.661	187.604
					RPM - WT
				D	Session	mouse 1	mouse 2	mouse 3	mouse 4	mouse 5	mouse 6	mouse 7	mouse 8				Cocaine - WT
					1	12	13	9	7	9	8	9	10				Time (min)	mouse 1	mouse 2	mouse 3	mouse 4	mouse 5	mouse 6	mouse 7	mouse 8	mouse 9	mouse 10
					2	14	12	8	6	6	9	9	12				5	66.5543	88.9824	82.469	14.0098	50.7448	95.9943	145.753	103.049	88.8568	74.348
					3	15	14	6	8	12	11	7	11				10	85.8719	97.0517	107.499	119.082	115.109	108.848	66.678	92.3605	95.1296	135.1
					4	14	14	9	8	7	6	11	19				15	136.5	108.43	114.614	119.778	106.068	103.308	90.6047	94.72	97.2585	85.6774
					5	14	19	11	8	8	5	14	17				20	111.074	105.536	95.4178	147.13	128.078	91.85	96.9639	109.871	118.755	104.874
					6	16	15	13	11	12	7	11	16				25	389.051	102.331	74.3362	166.24	251.179	208.385	194.81	219.354	204.614	255.649
					7	15	18	12	9	11	14	9	15				30	595.081	304.16	214.53	359.719	480.86	391.528	242.626	366.615	386.416	569.824
					8	17	17	18	8	12	12	11	15				35	642.586	432.039	192.078	444.147	475.988	539.393	380.875	595.033	363.473	674.541
					9	17	16	18	8	12	11	12	16				40	639.58	472.384	292.709	357.006	487.67	612.934	388.196	514.146	301.439	715.42
																	45	593.014	455.196	330.787	331.526	367.173	512.892	475.062	360.278	223.089	613.094
																	50	654.905	486.377	350.391	332.852	356.772	436.559	398.115	282.208	191.225	411.505
																	55	596.129	440.932	287.807	311.429	271.175	434.13	339.088	194.833	158.592	317.486
					RPM - KO												60	508.994	426.955	240.718	302.783	272.231	325.497	328.984	201.041	135.071	432.764
					Session	mouse 1	mouse 2	mouse 3	mouse 4	mouse 5	mouse 6	mouse 7	mouse 8
					1	8	10	9	12	8	9	8	13
					2	11	21	8	14	12	14	6	11
					3	13	15	7	18	9	16	8	16				Amphetamine - KO
					4	8	13	7	21	8	9	8	11			G	Time (min)	mouse 1	mouse 2	mouse 3	mouse 4	mouse 5	mouse 6	mouse 7	mouse 8
					5	16	12	9	22	11	15	14	11				5	154.518	112.008	81.302	118.766	141.256	62.1044	105.139	113.032
					6	15	11	9	22	16	15	18	19				10	80.7591	92.8174	104.194	96.4866	92.052	103.066	136.291	99.5592
					7	13	20	10	21	10	16	16	26				15	75.0849	102.657	112.037	102.836	120.509	119.671	110.483	123.939
					8	14	14	10	21	15	15	11	20				20	89.6381	92.5172	102.467	81.9114	46.1824	115.159	48.0878	63.4697
					9	9	22	9	22	18	18	15	16				25	28.4635	39.1724	47.232	111.486	84.2278	76.9308	76.184	82.5022
																	30	160.12	120.596	48.9545	310.281	243.303	149.065	29.4267	303.339
																	35	329.339	188.63	102.212	500.741	488.066	255.171	107.344	570.759
																	40	535.851	318.431	119.189	704.378	748.209	322.806	205.786	675.818
																	45	597.344	328.631	183.286	694.413	807.236	348.141	222.351	647.411
																	50	572.389	384.987	289.892	682.942	858.175	303.779	255.959	591.959
																	55	663.566	453.334	323.329	669.352	792.622	262.398	297.227	581.569
																	60	646.483	502.924	247.359	624.948	792.166	239.394	288.235	558.096
																	Amphetamine - WT
																	Time (min)	mouse 1	mouse 2	mouse 3	mouse 4	mouse 5	mouse 6	mouse 7
																	5	110.21	156.449	128.154	129.407	96.7265	94.2543	127.247
																	10	114.24	71.6076	99.2901	104.584	106.942	77.3684	86.7243
																	15	87.7167	64.8079	96.5832	60.3188	87.7869	135.113	66.2096
																	20	87.8328	107.135	75.9727	105.689	108.544	93.2648	119.819
																	25	235.097	230.131	105.024	59.3453	77.4789	128.565	57.3415
																	30	471.825	262.519	244.915	176.986	110.936	346.557	186.838
																	35	874.835	382.913	373.117	369.382	233.218	663.158	522.785
																	40	770.131	568.159	547.116	679.617	369.267	800.596	811.325
																	45	750.734	752.39	581.311	937.755	470.146	767.501	941.539
																	50	793.374	820.875	553.647	1048.94	433.294	843.878	985.231
																	55	723.114	873.943	638.052	1130.23	446.208	938.8	993.716
																	60	653.159	879.237	543.071	1058.58	408.952	979.726	1073.85

## Sheet: Figure 1-Fig Suppl 2 (F)
Ducrot et al., 2023
eLife
Conditional deletion of neurexins dysregulates neurotransmission from dopamine neurons
Raw Data
								B	WT (Rotarod 2)												WT (Rotarod 2)										C	Performance
									Session	Mouse 1	Mouse 2	Mouse 3	Mouse 4	Mouse 5	Mouse 6	Mouse 7	Mouse 8	Mouse 9	Mouse 10		Mouse 1	Mouse 2	Mouse 3	Mouse 4	Mouse 5	Mouse 6	Mouse 7	Mouse 8				WT (S1)	WT (S9)	KO (S1)	KO (S9)
									1	8	10	20	14	9	13	18	20	17	10		16	16	13	14	11	7	16	19				16	45	41	45
									2	16	9	14	15	17	16	24	13	16	12		11	13	17	15	10	12	13	17				22	31	40	45
									3	18	14	17	18	14	18	19	17	22	13		14	16	11	11	7	10	12	19				55	26	32	27
									4	19	12	20	12	16	14	15	3	20	9		12	15	15	16	8	13	14	14				36	36	33	33
									5	21	11	20	9	13	15	15	7	16	10		11	12	9	13	8	10	13	15				16	20	23	18
									6	18	17	21	12	12	11	26	16	26	9		16	15	13	10	9	8	11	11				31	25	11	12
									7	20	14	17	16	7	13	30	14	19	10		16	13	12	10	7	9	11	10				49	66	42	13
									8	24	14	20	16	7	7	28	15	20	8		17	13	15	13	8	8	11	9				54	48	52	38
									9	17	13	11	14	10	11	24	18	20	11		17	17	12	14	9	7	7	15				43	55
																																20	25
								D	WT (Rotarod 2)												WT (Rotarod 2)
									Session	Mouse 1	Mouse 2	Mouse 3	Mouse 4	Mouse 5	Mouse 6	Mouse 7	Mouse 8	Mouse 9	Mouse 10		Mouse 1	Mouse 2	Mouse 3	Mouse 4	Mouse 5	Mouse 6	Mouse 7	Mouse 8
									1	16	22	55	36	16	31	49	54	43	20		41	40	32	33	23	11	42	52
									2	41	16	35	38	45	41	68	32	40	29		26	30	45	36	22	26	32	43
									3	48	35	45	48	34	48	52	44	62	30		36	40	25	25	11	20	27	50
									4	50	27	55	27	40	35	38	31	55	16		28	36	39	40	13	32	34	36
									5	58	25	55	17	32	39	38	12	41	20		23	29	17	33	16	23	30	37
									6	49	43	58	28	27	26	75	40	73	17		42	38	30	10	16	15	25	25
									7	55	35	45	41	11	33	88	34	50	20		40	30	27	22	21	18	25	22
									8	66	33	53	42	11	13	82	37	55	15		44	30	28	32	14	14	24	19
									9	45	31	26	36	20	25	66	48	55	25		45	45	27	33	18	12	13	38
								E	Time to Turn							F	Time to go down				G	WT - Water
									WT	KO							WT	KO				BD1	51.0204	47.9675	49.2891	60.355	50.6849	48.9083
									5	7							5	11				BD2	47.2222	80.2469	46.1538	57.1429	43.4783	46.7391
									12	5							9	6				TD1	17.2043	9.09091	22.2222	24.5455	21.7949	23.4483
									14	5							5	5				TD2	26.7857	14.375	25.2874	19.7674	26.3158	29.8077
									2	3							7	9				TD3	20	12.6984	28.9855	15.3846	22.314	26.1364
									3	2							8	6
									13	3							4	11
									7	7							5	9				WT - Sucrose
									2								4					BD1	48.9796	52.0325	50.7109	39.645	49.3151	51.0917
									10								6					BD2	52.7778	19.7531	53.8462	42.8571	56.5217	53.2609
									3								5					TD1	82.7957	90.9091	77.7778	75.4545	78.2051	76.5517
																						TD2	73.2143	85.625	74.7126	80.2326	73.6842	70.1923
																						TD3	80	87.3016	71.0145	84.6154	77.686	73.8636
																						KO - Water
																						BD1	56.1404	53.719	45.0495	59.4203	49.7738	47.1366
																						BD2	52.439	42.3529	68.8679	50.6667	55.6818	51.5789
																						TD1	20.5128	20.5357	4.16667	28.8136	21.8045	16.6667
																						TD2	25.641	22.0472	20.8333	25.2874	31.0345	30.7692
																						TD3	21.4286	20	16.6667	23.2877	25	16.092
																						KO - Sucrose
																						BD1	43.8596	53.719	54.9505	40.5797	50.2262	52.8634
																						BD2	47.561	42.3529	31.1321	49.3333	44.3182	48.4211
																						TD1	79.4872	79.4643	95.8333	71.1864	78.1955	83.3333
																						TD2	74.359	77.9528	79.1667	74.7126	68.9655	69.2308
																						TD3	78.5714	80	83.3333	76.7123	75	83.908
