# Supplementary material for: Conditional deletion of neurexins dysregulates neurotransmission from dopamine neurons
Source: eLife. 2023 Jul 6;12:e87902. doi: 10.7554/eLife.87902 (PMC10409506; doi:10.7554/eLife.87902)
Supplement: Figure 2—source data 1. [file elife-87902-fig2-data1.xlsx]

## Sheet: Figure 2 (F)
Ducrot et al., 2023
eLife
Conditional deletion of neurexins dysregulates neurotransmission from dopamine neurons
Raw Data
								TH - Signal Surface						TH - Signal Intensity
							A	WT (vSTR)	KO (vSTR)	WT (dSTR)	KO (dSTR)		B	WT (vSTR)	KO (vSTR)	WT (dSTR)	KO (dSTR)
								15.6379	172.428	39.82	84.0157			70.4746	126.763	91.0661	126.417
								20.1646	52.6749	79.64	127.109			74.9972	156.416	93.8691	99.6148
								100	321.811	187.514	146.378			100.958	146.828	118.725	129.125
								139.506	191.77	36.7829	91.6873			128.266	139.867	91.4051	135.771
								187.243	114.198	90.3262	145.444			112.625	107.473	94.2861	105.582
								137.449	113.169	165.917	120.585			112.679	105.44	110.648	115.977
								58.8052	127.723	59.5899	111.85			66.8223	109.558	67.0448	98.832
								66.6334	140.833	130.472	83.4021			70.2888	130.8	127.214	74.9446
								141.357	117.76	117.734	54.3996			141.52	92.0916	117.084	75.129
								132.967	114.314	57.7079	81.0843			129.17	92.627	63.1825	74.632
								98.6578	75.81	127.996	115.713			98.1196	103.385	119.797	102.607
								101.579	52.4377	106.501	92.3168			94.0798	85.7203	105.678	82.0433
									74.6863		60.5606				73.5428		78.3303
									61.1274		78.3504				63.69		72.4362
								DAT - Signal Surface						DAT - Signal Intensity
							C	WT (vSTR)	KO (vSTR)	WT (dSTR)	KO (dSTR)		D	WT (vSTR)	KO (vSTR)	WT (dSTR)	KO (dSTR)
								165.821	43.7193	152.875	82.0808			127.496	65.5551	151.091	85.3702
								205.605	53.5873	85.0562	83.8858			160.83	79.1603	81.8685	82.0647
								18.1123	6.74526	115.127	74.3646			53.4174	45.5269	106.888	85.8507
								61.8315	45.2182	47.9234	81.8031			77.565	63.8366	64.0616	84.1844
								48.4659	20.9852	152.26	79.2046			64.9974	64.2006	144.161	82.2746
								69.5761	5.99578	93.0698	66.1724			78.6733	54.464	87.3196	74.863
								138.528	37.5986	100.548	71.3893			135.903	70.2882	99.6391	83.6927
								92.0603	12.6161	53.1403	76.7251			101.118	59.3895	64.9711	89.8123
								77.3019	106.899	99.2383	97.2182			59.982	104.843	89.2652	107.487
								85.15	107.258	103.726	97.9826			67.5247	114.849	108.264	84.4802
								120.287	107.515	96.5084	85.9927			138.467	97.1179	104.814	66.5331
								117.261	86.8428	100.527	100.429			134.026	63.5065	97.657	126.26
									81.0464		89.8802				61.8014		65.1452
									109.977		84.6169				96.6651		63.8227
								VMAT2 - Signal Surface						VMAT2 - Signal Intensity
							E	WT (vSTR)	KO (vSTR)	WT (dSTR)	KO (dSTR)		F	WT (vSTR)	KO (vSTR)	WT (dSTR)	KO (dSTR)
								35.6093	422.472	45.7974	199.909			71.1844	146.334	76.6606	141.942
								42.8695	169.749	77.8737	124.307			78.338	198.108	92.6102	115.099
								109.421	348.833	183.462	249.487			99.6392	153.655	124.9	151.94
								106.137	244.425	40.9814	201.908			113.996	169.57	80.8234	158.078
								172.169	179.43	95.502	133.757			112.284	120.194	111.403	112.85
								133.794	178.392	156.383	190.186			124.558	116.421	113.602	131.703
								33.6902	82.227	39.4239	100.234			60.7666	66.0362	63.0923	102.819
								38.5439	163.883	115.788	114.923			61.1921	87.5417	110.91	103.089
								171.734	106.781	151.215	80.6841			114.047	72.2844	131.673	79.0278
								140.471	94.7894	35.8596	103.69			112.868	71.433	61.5536	110.697
								120.485	121.913	124.104	98.1818			85.5691	114.666	107.527	104.403
								95.0749	96.5025	133.609	123.564			165.557	109.933	125.244	105.445
									87.0807		101.206				139.367		87.5685
									59.9572		92.3492				143.591		97.0768
