# Supplementary material for: Conditional deletion of neurexins dysregulates neurotransmission from dopamine neurons
Source: eLife. 2023 Jul 6;12:e87902. doi: 10.7554/eLife.87902 (PMC10409506; doi:10.7554/eLife.87902)
Supplement: Figure 3—source data 1. [file elife-87902-fig3-data1.xlsx]

## Sheet: Figure 3 (F)
Ducrot et al., 2023
eLife
Conditional deletion of neurexins dysregulates neurotransmission from dopamine neurons
Raw Data
					D	Varicosity Perimeter				E	Varicosity Length
						WT	KO				WT	KO
						2358.86	1869.98				831.142	922.622
						2242.86	2675.59				954.258	1003.33
						2581.64	2520.57				883.888	982.979
						2226.84	2397.77				920.055	701.95
					F	Varicosity Width				G	Surface Area
						WT	KO				WT	KO
						473.114	375.155				317883	230827
						386.151	474.569				250471	424766
						568.994	419.452				454465	297507
						446.522	456.859				271327	318449
					H	PSD Size
						WT	KO
						242.4	96.48
						267.05	166.46
						182.6	316.37
						295.82	104.006
						176.24	309.59
							157.56
							95.78
							172.8
							75
							183.44
							503.79
							184.156
