# Supplementary material for: Conditional deletion of neurexins dysregulates neurotransmission from dopamine neurons
Source: eLife. 2023 Jul 6;12:e87902. doi: 10.7554/eLife.87902 (PMC10409506; doi:10.7554/eLife.87902)
Supplement: Figure 4—source data 1. [file elife-87902-fig4-data1.xlsx]

## Sheet: Figure 4 (F)
Ducrot et al., 2023
eLife
Conditional deletion of neurexins dysregulates neurotransmission from dopamine neurons
Raw Data
							Saline
							B	vSTR DA Overflow			C	vSTR DA Tau			D	vSTR DA PPR
								WT	KO			WT	KO			WT	KO
								1.17431	1.22848			0.248509	0.426112			0.1019	0.181
								1.26243	1.06908			0.29514	0.420506			0.2129	0.1533
								0.858035	1.27815			0.245869	0.449434			0.1309	0.0809
								0.696794	1.03672			0.208702	0.392263			0.2166	0.0917
								0.908473	0.940447			0.615743	0.718957			0.0802	0.156
								0.794728	1.2896			0.558502	0.712581			0.0867	0.1058
								0.558768	0.780849			0.637711	0.74528			0.2781	0.0366
								1.06628	0.836913			0.605267	0.730373			0.2217	0.0769
								1.51178	1.24817			0.345932	0.24283			0.0999	0.0937
								0.632638	0.598491			0.274623	0.245229			0.2212	0.1091
								0.482578	0.841784			0.326856	0.255548			0.1336	0.0466
								0.868483	0.600796			0.268968	0.256685			0.1376	0.175
								0.822609	0.946644			0.299052	0.367351
								0.473376	0.689618			0.398791	0.308346
								0.858163	0.611295			0.354811	0.31729
								0.736885	0.53597			0.111732	0.326561
								1.72248	1.32586			0.327317	0.486966
								1.11234	0.915849			0.213967	0.560535
								0.67802	1.42217			0.185607	0.494616
								0.597966	1.2339			0.141327	0.476032
								1.27064	1.70073			0.380008	0.350632
								1.02827	1.50865			0.379962	0.319856
								0.833413	2.20546			0.375898	0.341249
								0.257808	0.787386			0.301611	0.340512
								1.11399	1.1388			0.209113	0.491711
								1.33039	0.510687			0.239764	0.38288
								0.882332	1.49681			0.184457	0.440688
								1.21897	1.30518			0.174158	0.411632
								1.03788	0.972371			0.421035	0.243364
								0.797173	0.674286			0.29317	0.350202
								0.872774	0.498179			0.354145	0.33563
								0.417465	0.833194			0.267127	0.259691
								0.925007	0.642277			0.439745	0.434391
								0.654604	1.06222			0.517288	0.406615
								0.580178	1.20706			0.514182	0.409709
								0.565431	0.495754			0.44888	0.449786
								1.12732	0.724637			0.542489	0.571014
								0.900328	0.636364			0.492485	0.612694
								1.68128	0.894598			0.519851	0.542272
								1.38741	0.493493			0.513539	0.601403
								1.14827	0.19875			0.227518	0.42417
								2.19949	0.467228			0.30156	0.354264
								0.840266	0.381758			0.217191	0.352903
								1.39722	0.700306			0.250655	0.343156
								1.68862	0.675106			0.473001
								1.25631	1.19113			0.349183
								0.509948	0.425967			0.36617
								1.0372				0.372543
							F	dSTR DA Overflow			G	dSTR DA Tau			H	vSTR DA PPR
								WT	KO			WT	KO			WT	KO
								1.33439	1.62122			0.257256	0.496238			0.0166	0.0587
								1.04957	1.41589			0.238287	0.456911			0.0212	0.0567
								0.567458	1.83127			0.330421	0.437154			0.0119	0.0818
								1.15055	1.35836			0.244808	0.429286			0.0118	0.0685
								0.881536	1.00816			0.787312	0.784758			-0.0017	0.0059
								1.49414	0.619467			0.533692	0.893946			0.0402	0.0332
								1.56003	0.860604			0.552593	0.851137			0.0823	0.023
								1.22932	1.51218			0.529233	0.650168			0.0895	0.1031
								1.66674	1.23962			0.354625	0.246322			0.0972	-0.0267
								1.93502	1.60918			0.276828	0.25369			0.0808	-0.0113
								1.88457	2.04937			0.272018	0.251316			0.0478	0.0848
								1.4163	1.2746			0.352736	0.221672			0.0156	0.1396
								2.09609	1.06182			0.348744	0.293393
								1.73289	0.46502			0.302413	0.244331
								1.17236	0.785104			0.472534	0.274683
								1.45644	1.00273			0.307052	0.267834
								1.70437	1.03698			0.230042	0.415036
								0.818219	0.96532			0.196696	0.403586
								0.780393	1.21477			0.170263	0.396845
								0.932488	0.758557			0.198517	0.401373
								1.71397	2.57775			0.384203	0.34994
								1.16513	1.99288			0.363304	0.274026
								1.75178	2.4307			0.397376	0.354335
								1.39624	2.10492			0.323166	0.279132
								1.17493	1.80357			0.192713	0.453428
								1.49765	1.40166			0.248556	0.455491
								1.2586	2.04875			0.235639	0.408793
								1.08614	1.80435			0.229696	0.451075
								1.13134	2.73496			0.346237	0.29984
								1.93805	1.95085			0.299339	0.297785
								0.621322	0.914676			0.585028	0.521335
								0.899224	1.31511			0.331963	0.315568
								1.5317	1.73651			0.484322	0.442033
								0.651587	1.35875			0.818004	0.43862
								1.19414	1.18453			0.461149	0.302385
								0.799468	2.00448			0.441392	0.408139
								1.55357	0.67912			0.468872	0.538507
								0.714251	0.751361			0.432053	0.537623
								1.40767	1.16555			0.510152	0.559628
								1.22282	0.839825			0.563467	0.658113
								1.08015	0.661808			0.237524	0.829682
								1.78932	0.572878			0.204203	0.877649
								0.947267	0.573255			0.174165	0.891687
								1.64437	0.519185			0.182169	0.339043
								1.6785	1.26158			0.353859	0.317123
								1.98428	1.37465			0.357817	0.364651
								1.72908	1.00139			0.43015	0.327251
								1.2387	0.419664			0.410147
							DHBE
							J	vSTR DA Overflow			K	vSTR Tau			L	vSTR (P2-P1)/P1
								WT dStr DA[o]	KO dStr DA[o]			WT vStr Tau	KO vStr Tau			WT PPR	KO PPR
								0.188866	0.287855			0.456678	1.03347			0.485413	0.515847
								0.184584	0.215732			0.84407	1.23413			0.479195	0.534244
								0.339798	0.226341			1.70222	2.10342			0.526226	0.881886
								0.510743	0.123244			1.637	1.96925			0.725971	0.651764
								0.761123	0.33499			1.33305	1.62041			0.792376	0.263417
								0.57373	0.277369			1.59841	1.38504			0.416032	0.322892
								0.493288				1.53089	1.39897			0.656474	1.41414
								0.378538				0.796527	2.3096			1.08976	0.791552
								0.495075				2.80225				1.00593
								0.428108				1.43914				0.370534
												0.580638				0.459096
												1.25706				0.585018
												1.55519				0.554274
							N	dSTR DA Overflow			O	dSTR Tau			P	dSTR (P2-P1)/P1
								WT vStr DA[o]	KO vStr DA[o]			WT dStr Tau	KO dStr Tau			WT PPR	KO PPR
								1.33823	0.186077			0.398705	0.46295			0.573079	0.432908
								0.251008	0.304157			1.0085	1.10019			0.415645	0.375603
								0.253098	0.147412			1.67792	1.02555			0.571741	0.672114
								0.946805	0.556966			1.08758	2.19747			0.587734	0.346405
								0.418033	0.211199			1.49735	0.939972			0.350002	0.618439
								0.398069	0.411219			0.814679	1.5758			0.237345	0.426018
								0.301282	0.046816			2.09763				0.293367
								0.535471	0.045509			0.642974				0.75957
								0.724543				1.90486				0.335612
								0.280947				2.61991				0.534902
								0.161354
								0.215591
								0.306805
								0.411875

## Sheet: Figure 4-Fig. suppl 1 (F)
Ducrot et al., 2023
eLife
Conditional deletion of neurexins dysregulates neurotransmission from dopamine neurons
Raw Data
							Before DBHE						Before DBHE						Before DBHE						Before DBHE
						F	DA vSTR Overflow					G	DA dSTR Overflow					I	DA vSTR Tau					J	DA dSTR Tau
							WT	KO					WT	KO					WT	KO					WT	KO
							1.15596	1.24845					1.3198	1.61441					0.351905	0.558904					0.349984	0.634739
							1.23937	1.06341					1.03659	1.42491					0.356703	0.578023					0.297519	0.586463
							0.834603	1.28043					0.549541	1.82711					0.330998	0.588027					0.448482	0.644544
							0.687272	1.03475					1.14005	1.36462					0.64273	0.873679					0.380331	0.519002
							0.904227	0.940911					0.886891	1.00829					0.569634	0.919727					1.05293	0.963093
							0.786525	1.29458					1.49723	0.6192					0.653346	0.982551					0.639469	0.998868
							0.565074	0.781675					1.56531	0.853629					0.630114	0.893406					0.718888	1.14173
							1.06912	0.845194					1.23201	1.51344					0.509765	0.345024					0.638688	0.760404
							1.49891	1.22594					1.66348	1.2291					0.335543	0.392183					0.455007	0.398057
							0.625998	0.587125					1.92086	1.61018					0.418419	0.382928					0.425281	0.388405
							0.486511	0.798199					1.87575	2.03999					0.365963	0.136117					0.39386	0.403162
							0.891883	0.600235					1.40717	1.26145					0.46984	0.545396					0.52663	0.345028
							0.813698	0.935342					2.12943	1.05939					0.49059	0.450521					0.543565	0.478367
							0.472207	0.678876					1.75152	0.483561					0.538767	0.488819					0.440872	0.257324
							0.853902	0.605119					1.16895	0.779074					0.402784	0.449072					0.706282	0.453051
							0.749074	0.535389					1.45515	0.99741					0.504939	0.64887					0.435821	0.386771
							1.66845	1.31404					1.64115	1.03939					0.299838	0.745819					0.338321	0.52238
							1.07656	0.911309					0.790121	0.976512					0.292231	0.672029					0.282262	0.495169
							0.636767	1.42693					0.692577	1.21031					0.222179	0.594297					0.247848	0.474845
							0.536823	1.23112					0.904836	0.760255					0.58588	0.534398					0.519536	0.542058
							1.27208	2.6526					1.72357	2.56878					0.453647	0.536407					0.504039	0.492878
							1.02954	1.67957					1.1707	1.98743					0.551636	0.461873					0.587994	0.369466
							0.83623	1.50198					1.75132	2.40721					0.44064	0.568206					0.375692	0.451448
							0.266031	2.18703					1.40192	2.08373					0.251902	0.620032					0.286069	0.639095
							1.0971	0.799617					1.18262	1.80201					0.376223	0.446182					0.32361	0.604054
							1.29308	1.22492					1.50199	1.41014					0.286978	0.513233					0.305084	0.533083
							0.807264	0.518527					1.22835	2.05158					0.327247	0.532499					0.368452	0.56559
							1.22274	1.49107					1.08607	1.80427					0.663426	0.457458					0.44503	0.438203
							0.998941	1.2171					1.12369	2.71517					0.447947	0.440741					0.456552	0.34858
							0.76006	0.967513					1.93965	1.95878					0.483134	0.538743					0.608432	0.62004
							0.840682	0.662403					0.634762	0.910801					0.388863	0.33205					0.455223	0.416379
							0.432132	0.508866					0.893586	1.27994					0.646782	0.580425					0.633316	0.586288
							0.911187	0.822597					1.54932	1.72288					0.702672	0.593025					0.915745	0.541926
							0.64006	0.611554					0.651958	1.392					0.725243	0.614787					0.563542	0.439046
							0.574969	1.01402					1.19297	1.13624					0.547851	0.595445					0.54541	0.537115
							0.563848	1.21593					0.773869	1.96213					0.693894	0.722448					0.572261	0.655986
							1.09808	0.498617					1.54291	0.671063					0.597217	0.62077					0.452438	0.587833
							0.838351	0.736889					0.709104	0.760752					0.738036	0.733999					0.745202	0.728226
							1.66015	0.663847					1.42018	1.17603					0.649391	1.39802					0.741658	0.692928
							1.38844	0.90635					1.21452	0.812926					0.336825	1.91097					0.441674	1.02474
							1.11873	0.491293					1.06314	0.658213					0.456213	1.31056					0.349256	1.11888
							2.15112	0.194906					1.74225	0.575283					0.320087	1.34254					0.271324	1.20736
							0.787336	0.471205					0.916979	0.575892					0.305439	0.623331					0.228933	1.30287
							1.30956	0.38125					1.59213	0.520232					0.797906	0.453641					0.482899	0.448021
							1.66807	0.69401					1.65717	1.25996					0.443944	0.481571					0.452324	0.375594
							1.23619	0.667027					1.97053	1.38208					0.663631	0.462374					0.644315	0.439106
							0.491527	1.18869					1.69963	1.00722					0.531583	1.79977					0.618166	0.324007
							1.02113	0.426484					1.2095	0.41519					0.766456	0.618438					0.276249	0.530777
							0.917918	0.201148					0.283512	0.920287					0.702909	0.53502					0.437918	0.641324
							0.933657	1.01055					0.281545	0.742216					0.945301	0.542403					0.583739	0.534247
							0.722552	0.731332					0.30047	0.494967					1.03252	1.77631					1.11281	0.717806
							0.41742	0.533376					0.696869	1.15121					1.3954	0.892759					0.568266	1.49449
							0.380928	0.267104					0.498671	0.433815					1.0968	0.715403					0.79821	0.761364
							0.352341	0.110897					0.579518	1.18773					1.28297	1.59819					0.917568	1.35496
							0.38213	0.499507					0.585319	0.680956					1.06171	0.968871					0.955169	1.09459
							0.584744	0.150197					0.957623	0.506667					1.06359	1.87613					1.11148	0.766057
							1.11127	0.288322					0.570947	1.3709					1.46637	2.02053					0.868536	0.771231
							0.322343	0.235486					0.807374	0.690937					1.34356	1.71472					1.07577	0.937498
							1.46293	1.48394					0.534521	0.65702					0.443977	1.20166					1.14499	0.928207
							0.296892	0.210871					1.07458	0.442647					0.508486	1.31745					1.36953	1.59426
							0.412702	0.762552					0.683934	0.316557					0.598951	1.99825					1.10908	1.21844
							0.341575	1.23108					1.09967	0.39911						1.23279					1.28152	1.2915
							1.53698	1.05004					0.902488	0.521274						0.983387					1.61387	1.37751
							0.216098	0.274898					1.31681	0.615045						1.30107					1.53701	1.0375
							0.581138	0.479088					0.527309	0.254352						1.29719					1.71782	0.759736
							0.460729	0.0912829					0.82462	0.354588						1.64561					1.23733	0.736205
							1.0577	0.0297139					0.799953	0.261878						1.48273					1.31797	1.08949
							0.638625	0.171097					0.503217	0.242907						2.24532					1.0375	1.03466
							1.59034	0.236886					1.39587	0.207945						1.66997					0.759736	1.44743
							0.243569	0.177566					1.32719	0.433188						1.31728					0.736205
							1.25633	0.354712					0.815434	0.831675						1.6078					0.508486
							0.179379	0.0601098					1.48984	0.701651						1.43084					0.598951
							0.150975	0.726397					0.170041	0.541332
							0.037399	0.183467					0.105978	0.572425
							0.226711	0.21729					0.655494	1.00056
							0.885344	1.11936					0.471961	0.248945
							0.864753	0.551287					0.360878
							0.544148	0.169809					0.296288
							0.374625	0.0688308					0.669163
							0.790336	0.336068					1.17354
							0.427431
							0.713298

## Sheet: Figure 4-Fig. suppl 2 (F)
Ducrot et al., 2023
eLife
Conditional deletion of neurexins dysregulates neurotransmission from dopamine neurons
Raw Data
								Saline											Baclofen
							A	dSTR (Rise)				B	vSTR (Rise)					C	Time (min)	WT								KO
								WT	KO				WT	KO					0	98.2653	100.448	96.4631	103.108	100.416	101.138	105.329		103.084	100.054	100.413	102.104	98.8505	101.529	102.302
								0.2	0.3				0.2	0.2					2.5	102.677	100.15	97.7217	103.58	97.836	101.124	102.627		102.021	97.0225	97.805	95.1543	100.494	100.929	103.192
								0.2	0.2				0.2	0.2					5	96.046	100.641	98.15	96.0843	101.038	100.943	99.7601		95.3361	100.257	103.305	103.437	100.459	101.12	95.1334
								0.2	0.2				0.2	0.2					7.5	103.011	98.7616	107.665	97.2281	100.71	96.7958	92.2831		99.5588	102.667	98.4767	99.305	100.196	96.4216	99.3724
								0.1	0.3				0.1	0.2					10	83.4186	100.418	100.707	85.8999	65.045	58.6126	89.3606		90.1182	86.1377	73.2194	99.356	97.1345	57.3927	98.1228
								0.4	0.4				0.3	0.4					12.5	62.4419	95.8608	81.3403	80.5218	66.8522	50.7284	68.8153		84.9249	79.0106	58.1093	93.4583	94.4917	44.2807	96.2725
								0.3	0.3				0.2	0.3					15	54.1395	88.0955	84.2133	75.555	75.2922	40.1876	48.0384		87.3605	64.6138	76.341	89.6774	95.4921	34.7182	94.4448
								0.3	0.4				0.3	0.3					17.5	51.7464	65.37	86.6053	88.599	67.2581	41.7778	46.307		89.3323	60.4887	71.6388	92.9419	94.6094	42.4742	92.4954
								0.3	0.4				0.3	0.3					20	51.0445	89.6525	91.9625	76.4881	66.5444	25.1809	55.4603		87.5369	64.0298	54.4582	93.1778	99.8228	27.4022	92.6144
								0.2	0.1				0.3	0.2					22.5	53.3507	87.3071	86.3022	82.5687	72.935	25.3999	103.3		88.5567	62.8089	56.8922	89.9005	96.086	23.6038	92.2545
								0.2	0.2				0.2	0.1					25	61.1852	96.8773	86.6514	76.2072	73.9368	39.7924	96.9039		84.0405	50.7006	50.7676	97.4688	98.7943	29.0611	91.6085
								0.2	0.1				0.2	0.2					27.5	69.862	90.0095	100.041	90.1342	76.0517	36.6454	101.811		84.8305	58.5649	50.5384	93.9429	100.792	21.4904	92.3395
								0.2	0.1				0.2	0.2					30	80.611	104.033	101.563	100.439	75.9208	45.4485	125.003		86.2976	56.546	50.2302	99.5154	108.415	26.6234	94.425
								0.2	0.1				0.2	0.3					32.5	82.2755	101.598	95.2704	89.0706	83.3655	61.0741	135.943		86.9993	49.958	38.1547	96.2127	101.156	24.5853	85.7884
								0.2	0.2				0.3	0.2
								0.3	0.1				0.3	0.2
								0.2	0.2				0.2	0.3
								0.2	0.2				0.2	0.3
								0.2	0.3				0.2	0.4
								0.2	0.3				0.2	0.3
								0.2	0.2				0.2	0.3
								0.2	0.3				0.2	0.3
								0.3	0.2				0.3	0.2
								0.2	0.2				0.2	0.2
								0.2	0.1				0.1	0.2
								0.2	0.3				0.2	0.3
								0.2	0.3				0.2	0.2
								0.2	0.3				0.2	0.3
								0.1	0.3				0.2	0.3
								0.2	0.2				0.3	0.1
								0.2	0.2				0.2	0.2
								0.2	0.3				0.3	0.2
								0.3	0.2				0.2	0.2
								0.2	0.2				0.2	0.2
								0.3	0.2				0.2	0.3
								0.2	0.2				0.3	0.3
								0.2	0.2				0.3	0.2
								0.3	0.2				0.3	0.2
								0.2	0.3				0.2	0.2
								0.3	0.3				0.3	0.3
								0.3	0.3				0.3	0.3
								0.1	0.4				0.1	0.3
								0.1	0.3				0.2	0.4
								0.1	0.4				0.2	0.2
								0.2	0.3				0.2	0.2
								0.3	0.2				0.3	0.3
								0.2	0.3				0.3	0.2
								0.2	0.2				0.3
								0.2	0.2				0.2
