# Supplementary material for: Conditional deletion of neurexins dysregulates neurotransmission from dopamine neurons
Source: eLife. 2023 Jul 6;12:e87902. doi: 10.7554/eLife.87902 (PMC10409506; doi:10.7554/eLife.87902)
Supplement: Figure 5—source data 1. [file elife-87902-fig5-data1.xlsx]

## Sheet: Figure 5 (F)
	Ducrot et al., 2023
	eLife
	Conditional deletion of neurexins dysregulates neurotransmission from dopamine neurons
	Raw Data
	Figure 5C. Raw data for oIPSC amplitude in ventral striatum of WT and KO mice								Figure 5D. Raw data for oIPSC decay tau in ventral striatum of WT and KO mice								Figure 5E. Raw data for oIPSC amplitude in dorsal striatum WT and KO mice								Figure 5F. Raw data for oIPSC decay tau in dorsal striatum of WT and KO mice
		WT	KO							WT	KO							WT	KO							WT	KO
	Amplitude	pA	pA						Amplitude	pA	pA						Amplitude	pA	pA						Amplitude	pA	pA
	SEM	4.22859	18.1993						SEM	2.84324	11.2396						SEM	130.465	20.1502						SEM	13.5383	10.1229
	Average	42.8815	99.8502						Average	20.9247	47.0769						Average	439.925	150.348						Average	94.8729	89.6737
		31.6206	55.5672							11.3311	26.0586							33.962	54.5741							5.22219	31.5454
		50.6739	203.181							8.96187	28.2235							50.0576	39.2997							52.8562	221.584
		24.9527	313.814							23.8788	15.6181							50.7151	395.947							89.083	126.39
		56.5836	77.8838							15.2959	138.556							1242.95	152.068							52.0622	106.836
		49.684	233.587							29.2225	162.766							1090.85	52.0497							88.7821	48.6958
		77.161	73.6368							25.4592	120.152							82.0647	288.877							83.164	92.3864
		42.0171	103.321							18.6712	21.6839							139.651	75.541							95.9357	123.52
		38.4742	55.9512							37.1519	24.5299							1269.97	37.9413							104.387	87.1729
		30.8066	109.746							12.8965	50.6204							1251.02	30.3109							112.258	81.7514
		32.5704	55.8152							26.378	20.9908							73.7898	96.8536							118.134	32.132
		26.3757	27.9364								19.3847							629.982	375.981							186.099	13.6888
		19.3419	39.8246								19.4182							236.227	92.5971							150.492	53.4968
		71.5112	52.6943								16.6844							149.308	213.748								35.7535
		59.1051	33.9529								42.942							209.428	26.7056								85.0097
		45.8635	88.858								46.0054							88.8861	150.993								81.9954
		29.3632	134.348								27.5131								77.0286								54.2902
			94.0454								19.1607								99.6265								147.455
			43.1409																107.453								143.042
																			167.972								110.093
																			147.67								86.4182
																			154.69								92.2269
																			155.262								117.338
																			209.68
																			196.197
																			88.0063
																			352.311
																			220.013
		Statistical test: Mann-Whitney Test								Statistical test: Mann-Whitney Test								Statistical test: Mann-Whitney Test								Statistical test: Mann-Whitney Test
		P value	0.0014							P value	0.0649							P value	0.3613							P value	0.6287
		P value summary	**							P value summary	ns							P value summary	ns							P value summary	ns

## Sheet: Figure 5-Fig. suppl 1 (F)
Ducrot et al., 2023
eLife
Conditional deletion of neurexins dysregulates neurotransmission from dopamine neurons
Raw Data
							A	GFP % Area Normalized on TH signal				B	GFP % Area Normalized on DAT signal
							Mice	SV	SD			Mice	SV	SD
							1	95.7253	107.348			1	93.9151	97.9571
							2	81.9921	116.184			2	100.223	91.1442
							3	100.988	104.942			3	99.5478	95.8234
							4	100.478	106.572			4	97.888	96.4857
							5	96.6261	104.293			5	95.201	95.9186

## Sheet: Figure 5-Fig. suppl 2 (F)
	Ducrot et al., 2023
	eLife
	Conditional deletion of neurexins dysregulates neurotransmission from dopamine neurons
	Raw Data
	Figure 5-Fig. suppl 2A. Raw data for oIPSC picrotoxin wash-in experiment in V.Str										Figure 5-Fig. suppl 2B. Raw data for oIPSC reserpine wash-in experiment in V.Str											Figure 5-Fig. suppl 2C. Raw data for oIPSC response delay in V.Str					Figure 5-Fig. suppl 2D. Raw data for oIPSC rise time in V.Str					Figure 5-Fig. suppl 2E. Raw data for oIPSC response delay in D.Str					Figure 5-Fig. suppl 2F. Raw data for oIPSC rise time in D.Str					Figure 5-Fig. suppl 2G. Raw data for oEPSC CNQX + AP5 wash-in experiment in V.Str
		WT										WT											WT	KO				WT	KO				WT	KO				WT	KO				WT
																						Amplitude	pA	pA			Amplitude	pA	pA			Amplitude	pA	pA			Amplitude	pA	pA
																						SEM	0.299821	0.611236			SEM	0.536771	0.226474			SEM	0.55766	0.881486			SEM	0.503352	0.339188
			#949											#949	#956							Average	5.3492	4.83369			Average	3.34666	3.18864			Average	5.66056	5.85583			Average	2.99921	3.55637					960
		Time (Seconds)	Cell2	Cell3	Avg. (Raw)	SEM	Avg. (Positive)					Time (Seconds)	Time (Minutes)	Cell1	Cell1	Cell2	Avg. (Raw)	SEM	Avg. (Positive)				6.23333	3.51667				2.85654	3.43613				3.9875	3.3				1.17709	2.36952				Time (Seconds)		Cell2	Avg. (Raw)	SEM	Avg. (Positive)
		-60	-64.2666	-56.3884	-60.3275	3.9391	60.3275					-60	-1.2	-190.398	-178.684	-185.74	-184.94	3.40515	184.94				5.73333	4.54				1.989	2.9131				4.20001	4.70741				3.10121	3.0224				-60	-10.7969	-28.9917	-19.8943	9.09739	19.8943
		-50	-70.613	-37.6154	-54.1142	16.4988	54.1142					-50	-1	-74.5301	-118.35	-183.81	-125.563	31.7519	125.563				4.32857	2.4923				2.86559	2.13987				5.93333	6.59091				2.52556	3.94049				-50	-10.6999	-6.43889	-8.56942	2.13053	8.56942
		-40	-74.9368	-41.3413	-58.139	16.7977	58.139					-40	-0.8	-82.2503	-146.218	-160.363	-129.611	24.0296	129.611				4.875	6.075				2.78723	3.43192				5.67143	6.0625				2.82478	5.42051				-40	-11.9033	-13.9716	-12.9375	1.03414	12.9375
		-30	-82.9489	-23.9248	-53.4368	29.5121	53.4368					-30	-0.6	-99.2404	-131.67	-140.15	-123.687	12.4659	123.687				4.975	6.60909				5.7512	3.32041				5.29166	5.1				3.13187	3.15362				-30	-15.7875	-11.4256	-13.6065	2.18093	13.6065
		-20	-59.0432	-31.7053	-45.3743	13.669	45.3743					-20	-0.4	-120.143	-114.419	-143.679	-126.08	8.95325	126.08				5.95	4.025				3.83041	2.99442				6.1	4.21667				2.61043	3.37156				-20	-9.75747	-8.42519	-9.09133	0.666139	9.09133
		-10	-60.6682	-27.4755	-44.0718	16.5963	44.0718					-10	-0.2	-81.3493	-197.349	-100.138	-126.279	35.9467	126.279					6.57778					4.08465				8.44	6.69999				5.62356	3.44546				-10	-15.2453	-7.38203	-11.3136	3.93162	11.3136
	Picrotoxin start	0	-44.6187	-17.1347	-30.8767	13.742	30.8767				Reserpine (1 uM) start	0	0	-110.037	-149.06	-111.276	-123.458	12.806	123.458															3.875					2.47061			CNQX + AP5 start	0	-10.5665	-16.9802	-13.7733	3.20681	13.7733
		10	-37.6796	-24.0726	-30.8761	6.80348	30.8761					10	0.2	-47.0107	-136.236	-99.7457	-94.3307	25.899	94.3307															12.15					4.81321				10	-8.35294	-14.4631	-11.408	3.0551	11.408
		20	-46.1604	-19.98	-33.0702	13.0902	33.0702					20	0.4	-70.7973	-113.401	-103.173	-95.7905	12.8407	95.7905																								20	-7.4882	-7.85464	-7.67142	0.18322	7.67142
		30	-30.4679	-12.8693	-21.6686	8.79931	21.6686					30	0.6	-69.0644	-159.002	-88.505	-105.524	27.3218	105.524																								30	-10.1411	-9.99786	-10.0695	0.0716381	10.0695
		40	-36.0799	-19.3847	-27.7323	8.34758	27.7323					40	0.8	-57.5468	-97.6844	-105.341	-86.8575	14.8211	86.8575																								40	-6.3784	-10.7469	-8.56267	2.18427	8.56267
		50	-25.0004	-16.2915	-20.6459	4.35445	20.6459					50	1	-71.1948	-116.969	-104.88	-97.6812	13.6953	97.6812																								50	-9.37974	-7.19192	-8.28583	1.09391	8.28583
		60	-42.5278	-24.6895	-33.6086	8.91915	33.6086					60	1.2	-44.9792	-84.4691	-84.0352	-71.1612	13.0916	71.1612																								60	-5.88137	-9.27845	-7.57991	1.69854	7.57991
		70	-25.6523	-13.2916	-19.4719	6.18035	19.4719					70	1.4	-45.5108	-83.8648	-58.308	-62.5612	11.2742	62.5612																								70	0	-8.84023	-4.42012	4.42012	4.42012
		80	-27.3377	-17.095	-22.2164	5.12136	22.2164					80	1.6	-52.9144	-59.4436	-153.522	-88.6267	32.5024	88.6267				Statistical test: Student's t-test					Statistical test: Student's t-test					Statistical test: Student's t-test					Statistical test: Student's t-test					80	0	-8.79718	-4.39859	4.39859	4.39859
		90	-28.1903	-15.0942	-21.6423	6.54806	21.6423					90	1.8	-45.427	-103.666	-65.3528	-71.4821	17.0893	71.4821																								90	0	-8.67487	-4.33744	4.33744	4.33744
		100	-33.5208	-12.7644	-23.1426	10.3782	23.1426					100	2	-47.8725	-83.4912	-71.2855	-67.5498	10.4505	67.5498																								100	0	-6.01981	-3.00991	3.00991	3.00991
		110	-21.0687	-36.7701	-28.9194	7.85072	28.9194					110	2.2	-40.516	-88.94	-62.5626	-64.0062	13.9974	64.0062																								110	0	-7.56269	-3.78134	3.78134	3.78134
		120	-21.9854	-15.1798	-18.5826	3.40278	18.5826					120	2.4	-30.5428	-80.017	-51.916	-54.1586	14.3259	54.1586				P value	0.488518				P value	0.779686				P value	0.854405				P value	0.37836				120	0	-8.14529	-4.07264	4.07264	4.07264
		130	-23.5889	-17.1699	-20.3794	3.20951	20.3794					130	2.6	-35.8303	-56.5887	-75.39	-55.9363	11.4246	55.9363				P value summary	ns				P value summary	ns				P value summary	ns				P value summary	ns				130	0	-11.2787	-5.63937	5.63937	5.63937
		140	-32.3555	-33.2475	-32.8015	0.445997	32.8015					140	2.8	-42.5989	-75.2368	-61.1312	-59.6556	9.45058	59.6556																								140	0	-8.14635	-4.07318	4.07318	4.07318
		150	-17.2503	-16.3349	-16.7926	0.457746	16.7926					150	3	-21.568	-68.4923	-47.5066	-45.8556	13.571	45.8556																								150	0	-5.53859	-2.76929	2.76929	2.76929
		160	-16.4968	-24.5671	-20.5319	4.03514	20.5319					160	3.2	-34.4818	-68.8994	-57.3148	-53.5653	10.1108	53.5653																								160	0	-6.86054	-3.43027	3.43027	3.43027
		170	-15.7222	-20.475	-18.0986	2.3764	18.0986					170	3.4	-18.5788	-55.831	-66.2464	-46.8854	14.4691	46.8854																								170	0	-9.37808	-4.68904	4.68904	4.68904
		180	-18.6782	-12.3324	-15.5053	3.17293	15.5053					180	3.6	-12.7423	-51.2483	-61.4964	-41.829	14.8412	41.829																								180	0	-11.763	-5.88149	5.88149	5.88149
		190	-15.9733	-18.7093	-17.3413	1.368	17.3413					190	3.8	-41.0479	-65.887	-30.6663	-45.867	10.449	45.867																								190	0	-7.9354	-3.9677	3.9677	3.9677
		200	-25.0899	-18.1242	-21.6071	3.48281	21.6071					200	4	-29.368	-59.3829	-61.0008	-49.9172	10.2852	49.9172																								200	0	-9.99838	-4.99919	4.99919	4.99919
		210	-21.9176	-21.8404	-21.879	0.038579	21.879					210	4.2	-21.2316	-74.8274	-67.76	-54.6063	16.8116	54.6063																								210	0	-8.96736	-4.48368	4.48368	4.48368
		220	-27.1837	-16.5158	-21.8497	5.33396	21.8497					220	4.4	-22.9353	-72.1128	-48.5976	-47.8819	14.2008	47.8819																								220	0	-6.96732	-3.48366	3.48366	3.48366
		230	-15.2942	-21.6251	-18.4596	3.16547	18.4596					230	4.6	-23.3179	-30.6111	-52.7347	-35.5546	8.8443	35.5546																								230	0	-6.50996	-3.25498	3.25498	3.25498
		240	-16.3936	-20.1038	-18.2487	1.85511	18.2487					240	4.8	-22.7364	-37.0759	-65.9021	-41.9048	12.6926	41.9048																								240	0	-8.79018	-4.39509	4.39509	4.39509
		250	-16.6425	-13.9535	-15.298	1.34447	15.298					250	5	-19.0558	-36.911	-45.6577	-33.8748	7.82792	33.8748																								250	0	-13.4898	-6.74491	6.74491	6.74491
		260	-14.5953	-19.7152	-17.1552	2.55992	17.1552					260	5.2	-17.4233	-39.6898	-35.1102	-30.7411	6.78887	30.7411																								260	0	-6.35314	-3.17657	3.17657	3.17657
		270	-29.0289	-22.5911	-25.81	3.21889	25.81					270	5.4	-27.2248	-29.9191	-42.7887	-33.3109	4.80233	33.3109																								270	0	0	0	0	0
		280	-12.0098	-19.6935	-15.8516	3.84184	15.8516					280	5.6	-14.1605	-36.9713	-45.911	-32.3476	9.45264	32.3476																								280	0	0	0	0	0
		290	-20.3314	-13.4434	-16.8874	3.44401	16.8874					290	5.8	-18.4185	-29.4733	-27.3289	-25.0736	3.38462	25.0736																								290	0	0	0	0	0
		300	-16.8058	-22.4366	-19.6212	2.8154	19.6212					300	6	-14.1664	-19.131	-46.0921	-26.4631	9.91855	26.4631																								300	0	0	0	0	0
		310	-18.9462	-10.7705	-14.8584	4.08786	14.8584					310	6.2	-24.7844	-35.4561	-61.2355	-40.492	10.8196	40.492																								310	0	0	0	0	0
		320	-16.2092	-17.0278	-16.6185	0.409273	16.6185					320	6.4	-25.6424	-42.6825	-29.5499	-32.6249	5.15374	32.6249																								320	0	0	0	0	0
		330	-13.6379	-14.7557	-14.1968	0.558855	14.1968					330	6.6	-30.7801	-28.38	-39.0088	-32.723	3.21837	32.723																								330	0	0	0	0	0
		340	-13.4886	-12.3312	-12.9099	0.578687	12.9099					340	6.8	-14.9229	-24.6227	-35.4775	-25.0077	5.93672	25.0077																								340	0	0	0	0	0
		350	-14.3616	-12.7369	-13.5493	0.812344	13.5493					350	7	-24.803	-34.3543	-32.341	-30.4994	2.90689	30.4994																								350	0	0	0	0	0
		360	-24.4532	-18.4732	-21.4632	2.99002	21.4632					360	7.2	-22.5078	-22.1675	-47.1867	-30.6207	8.2836	30.6207																								360	0	0	0	0	0
		370	-20.3128	-11.4603	-15.8865	4.42625	15.8865					370	7.4	-20.3816	-34.8214	-32.9711	-29.3914	4.53645	29.3914																								370	0	0	0	0	0
		380	-17.5545	-11.5073	-14.5309	3.02359	14.5309					380	7.6	-21.158	-29.2827	-42.3856	-30.9421	6.18382	30.9421																								380	0	0	0	0	0
		390	-22.7415	-10.6198	-16.6807	6.06086	16.6807					390	7.8	-47.4319	-32.1133	-29.851	-36.4654	5.52199	36.4654																								390	0	0	0	0	0
		400	-21.9074	-12.4018	-17.1546	4.75282	17.1546					400	8	-25.341	-25.3857	-29.9971	-26.9079	1.54466	26.9079																								400	0	0	0	0	0
		410	-13.2775	-10.75	-12.0137	1.26372	12.0137					410	8.2	-23.4301	-32.7118	-28.6368	-28.2596	2.68602	28.2596																								410	0	0	0	0	0
		420	-14.2075	-13.7937	-14.0006	0.206915	14.0006					420	8.4	-17.4528	-38.9112	-47.173	-34.5124	8.85691	34.5124																								420	0	0	0	0	0
		430	-12.3221	-9.69429	-11.0082	1.31388	11.0082					430	8.6	-23.2126	-21.5829	-33.6833	-26.1596	3.79115	26.1596																								430	0	0	0	0	0
		440	-14.6144	-10.6286	-12.6215	1.99288	12.6215					440	8.8	-27.8748	-25.7263	-49.9872	-34.5295	7.75373	34.5295																								440	0	0	0	0	0
		450	-13.1656	0	-6.58278	6.58278	6.58278					450	9	-33.68	-34.897	-28.1856	-32.2542	2.06442	32.2542																								450	0	0	0	0	0
		460	-15.1746	0	-7.58732	7.58732	7.58732					460	9.2	-24.9629	-36.6787	-39.1923	-33.6113	4.38465	33.6113																								460	0	0	0	0	0
		470	-14.3953	0	-7.19766	7.19766	7.19766					470	9.4	-27.3103	-16.5497	-40.895	-28.2517	7.04362	28.2517																								470	0	0	0	0	0
		480	-11.8192	0	-5.90959	5.90959	5.90959					480	9.6	-26.6842	-15.0576	-26.6703	-22.8041	3.87322	22.8041																								480	0	0	0	0	0
		490	-16.3818	0	-8.19091	8.19091	8.19091					490	9.8	-29.767	-14.0405	-28.6785	-24.162	5.0705	24.162
		500	-12.784	0	-6.39202	6.39202	6.39202					500	10	-25.5541	-45.1875	-24.2699	-31.6705	6.76866	31.6705
		510	-11.0065	0	-5.50324	5.50324	5.50324					510	10.2	-27.3846	-15.3396	-35.7398	-26.1547	5.92104	26.1547
		520	-12.6776	0	-6.33878	6.33878	6.33878					520	10.4	-35.1512	-23.2261	-21.8238	-26.7337	4.22817	26.7337
		530	-12.59	0	-6.29502	6.29502	6.29502					530	10.6	-20.3682	-24.9996	-33.6067	-26.3248	3.87864	26.3248
		540	-12.9582	0	-6.4791	6.4791	6.4791					540	10.8	-30.0902	-25.3456	-34.8564	-30.0974	2.74552	30.0974
		550	-11.1942	0	-5.59709	5.59709	5.59709					550	11	-17.4874	-26.0452	-32.2705	-25.2677	4.2852	25.2677
		560	-15.2855	0	-7.64274	7.64274	7.64274					560	11.2	-25.9516	-17.9182	-25.8532	-23.241	2.66156	23.241
		570	-10.754	0	-5.377	5.377	5.377					570	11.4	-25.2823	-29.0751	-16.6431	-23.6668	3.6786	23.6668
		580	-10.6651	0	-5.33253	5.33253	5.33253					580	11.6	-27.2548	-13.1631	-20.8214	-20.4131	4.07306	20.4131
		590	-10.9103	0	-5.45513	5.45513	5.45513					590	11.8	-20.8149	-21.0997	-32.806	-24.9069	3.95042	24.9069
												600	12	-34.0034	-18.0449	-25.8512	-25.9665	4.6072	25.9665
												610	12.2	-23.1633	-30.8562	-39.3738	-31.1311	4.68158	31.1311
												620	12.4	-34.6549	-13.6485	-14.1416	-20.815	6.9214	20.815
												630	12.6	-17.6671	-13.0844	-21.016	-17.2558	2.29888	17.2558
												640	12.8	-27.9272	-9.54431	-16.5812	-18.0176	5.35507	18.0176
												650	13	-28.1729	-19.4691	-19.3157	-22.3193	2.92715	22.3193
												660	13.2	-27.6431	-24.0794	-36.7464	-29.4896	3.77139	29.4896
												670	13.4	-18.4508	-15.5825	-31.4749	-21.8361	4.89003	21.8361
												680	13.6	-20.938	-13.9302	-20.5085	-18.4589	2.26773	18.4589
												690	13.8	-21.7028	-10.5155	-17.2095	-16.4759	3.25024	16.4759
												700	14	-28.2727	-11.6979	-21.0318	-20.3341	4.79742	20.3341
												710	14.2	-17.4681	-17.9202	-17.2667	-17.5517	0.193217	17.5517
												720	14.4	-24.8553	-22.4743	-34.8914	-27.407	3.8048	27.407
												730	14.6	-17.7666	-18.6541	-13.7824	-16.7344	1.49803	16.7344
												740	14.8	-18.9628	-12.6731	-20.1943	-17.2768	2.32911	17.2768
												750	15	-18.3055	-18.325	-16.8058	-17.8121	0.503187	17.8121
												760	15.2	-22.2363	-13.3619	-16.1507	-17.2496	2.62007	17.2496
												770	15.4	-18.5413	-13.2556	-24.7607	-18.8525	3.32488	18.8525
												780	15.6	-14.04	-13.3162	-25.3772	-17.5778	3.9053	17.5778
											Picrotoxin (50 uM) start	790	15.8	-11.2995	-16.7492	-19.0523	-15.7004	2.29868	15.7004
												800	16	-14.8414	-18.7456	-11.6422	-15.0764	2.05392	15.0764
												810	16.2	-20.0298	-14.152	-14.8204	-16.3341	1.85792	16.3341
												820	16.4	-15.4815	-18.7387	-12.7141	-15.6448	1.74104	15.6448
												830	16.6	-23.5756	-13.8726	-14.2617	-17.2366	3.17146	17.2366
												840	16.8	-28.0896	-12.3023	-11.7437	-17.3785	5.35796	17.3785
												850	17	-21.1822	-14.1745	-25.1404	-20.1657	3.20612	20.1657
												860	17.2	-20.4527	-15.8116	-11.4612	-15.9085	2.59608	15.9085
												870	17.4	-21.5136	-12.483	-27.8681	-20.6216	4.46364	20.6216
												880	17.6	-25.1512	-10.8877	-17.8026	-17.9472	4.11814	17.9472
												890	17.8	-26.6943	-17.1138	-26.9314	-23.5798	3.23376	23.5798
												900	18	-15.4751	0	-12.3348	-9.26999	4.72281	9.26999
												910	18.2	-12.0509	0	-12.7822	-8.2777	4.14423	8.2777
												920	18.4	-13.8405	0	-16.9138	-10.2514	5.20193	10.2514
												930	18.6	-19.4304	0	-14.0907	-11.1737	5.79559	11.1737
												940	18.8	-16.7142	0	-13.5759	-10.0967	5.12899	10.0967
												950	19	-21.0372	0	-17.6086	-12.882	6.51658	12.882
												960	19.2	-13.3188	0	-31.3862	-14.9017	9.09492	14.9017
												970	19.4	-15.5887	0	-13.1104	-9.56638	4.8364	9.56638
												980	19.6	-23.8218	0	-18.2848	-14.0355	7.19749	14.0355
												990	19.8	-24.5928	0	-12.8041	-12.4657	7.10136	12.4657
												1000	20	-18.5218	0	-13.6957	-10.7392	5.54737	10.7392
												1010	20.2	-22.7759	0	-11.9585	-11.5781	6.57758	11.5781
												1020	20.4	-19.5646	0	-11.872	-10.4789	5.69062	10.4789
												1030	20.6	-15.6984	0	-12.8533	-9.51724	4.82898	9.51724
												1040	20.8	-18.6141	0	-13.0024	-10.5388	5.51279	10.5388
												1050	21	-22.1584	0	-12.0371	-11.3985	6.40454	11.3985
												1060	21.2	-33.9501	0	0	-11.3167	11.3167	11.3167
												1070	21.4	-17.0973	0	0	-5.69912	5.69912	5.69912
												1080	21.6	-19.155	0	0	-6.385	6.385	6.385
												1090	21.8	-13.023	0	0	-4.34101	4.34101	4.34101
												1100	22	-34.9169	0	0	-11.639	11.639	11.639
												1110	22.2	-13.9078	0	0	-4.63593	4.63593	4.63593
												1120	22.4	-20.3995	0	0	-6.79983	6.79983	6.79983
												1130	22.6	-27.2632	0	0	-9.08773	9.08773	9.08773
												1140	22.8	-12.7095	0	0	-4.2365	4.2365	4.2365
												1150	23	-21.5961	0	0	-7.19871	7.19871	7.19871
												1160	23.2	-13.5142	0	0	-4.50474	4.50474	4.50474
												1170	23.4	-20.0543	0	0	-6.68476	6.68476	6.68476
												1180	23.6	-19.5542	0	0	-6.51807	6.51807	6.51807
												1190	23.8	-21.5856	0	0	-7.19521	7.19521	7.19521
												1200	24	-14.017	0	0	-4.67232	4.67232	4.67232
												1210	24.2	-23.7087	0	0	-7.90291	7.90291	7.90291
												1220	24.4	-14.4408	0	0	-4.8136	4.8136	4.8136
												1230	24.6	-22.6897	0	0	-7.56323	7.56323	7.56323
												1240	24.8	-15.5017	0	0	-5.16722	5.16722	5.16722
												1250	25	-13.2102	0	0	-4.4034	4.4034	4.4034
												1260	25.2	-17.2246	0	0	-5.74154	5.74154	5.74154
												1270	25.4	-12.4526	0	0	-4.15086	4.15086	4.15086
												1280	25.6	-14.3375	0	0	-4.77918	4.77918	4.77918
												1290	25.8	-12.7971	0	0	-4.26569	4.26569	4.26569
												1300	26	-14.879	0	0	-4.95967	4.95967	4.95967
												1310	26.2	-15.886	0	0	-5.29532	5.29532	5.29532
												1320	26.4	-14.2724	0	0	-4.75747	4.75747	4.75747
												1330	26.6	-11.237	0	0	-3.74566	3.74566	3.74566
												1340	26.8	-22.8707	0	0	-7.62356	7.62356	7.62356
												1350	27	-9.69094	0	0	-3.23031	3.23031	3.23031
												1360	27.2	-13.1614	0	0	-4.38712	4.38712	4.38712
												1370	27.4	-9.16464	0	0	-3.05488	3.05488	3.05488
												1380	27.6	-16.1525	0	0	-5.38415	5.38415	5.38415
												1390	27.8	-19.8667	0	0	-6.62224	6.62224	6.62224
												1400	28	-13.2081	0	0	-4.40269	4.40269	4.40269
												1410	28.2	-14.8238	0	0	-4.94128	4.94128	4.94128
												1420	28.4	-15.8832	0	0	-5.29441	5.29441	5.29441
												1430	28.6	-14.3959	0	0	-4.79865	4.79865	4.79865
												1440	28.8	-12.5231	0	0	-4.17436	4.17436	4.17436
												1450	29	-10.5383	0	0	-3.51278	3.51278	3.51278
												1460	29.2	-9.50812	0	0	-3.16937	3.16937	3.16937
												1470	29.4	-8.21107	0	0	-2.73702	2.73702	2.73702
												1480	29.6	-10.3513	0	0	-3.45042	3.45042	3.45042
												1490	29.8	-12.0109	0	0	-4.00365	4.00365	4.00365
												1500	30	-9.26412	0	0	-3.08804	3.08804	3.08804
												1510	30.2	-10.2589	0	0	-3.41963	3.41963	3.41963
												1520	30.4	-8.46957	0	0	-2.82319	2.82319	2.82319
												1530	30.6	-9.99526	0	0	-3.33175	3.33175	3.33175

## Sheet: Figure 5-Fig. suppl 3
Figure 5-Fig. suppl 3. Raw data for oEPSC CNQX + AP5 wash-in experiment in V.Str
	WT
		960
	Time (Seconds)		Cell2	Avg. (Raw)	SEM	Avg. (Positive)
	-60	-10.7969	-28.9917	-19.8943	9.09739	19.8943
	-50	-10.6999	-6.43889	-8.56942	2.13053	8.56942
	-40	-11.9033	-13.9716	-12.9375	1.03414	12.9375
	-30	-15.7875	-11.4256	-13.6065	2.18093	13.6065
	-20	-9.75747	-8.42519	-9.09133	0.666139	9.09133
	-10	-15.2453	-7.38203	-11.3136	3.93162	11.3136
CNQX + AP5 start	0	-10.5665	-16.9802	-13.7733	3.20681	13.7733
	10	-8.35294	-14.4631	-11.408	3.0551	11.408
	20	-7.4882	-7.85464	-7.67142	0.18322	7.67142
	30	-10.1411	-9.99786	-10.0695	0.0716381	10.0695
	40	-6.3784	-10.7469	-8.56267	2.18427	8.56267
	50	-9.37974	-7.19192	-8.28583	1.09391	8.28583
	60	-5.88137	-9.27845	-7.57991	1.69854	7.57991
	70	0	-8.84023	-4.42012	4.42012	4.42012
	80	0	-8.79718	-4.39859	4.39859	4.39859
	90	0	-8.67487	-4.33744	4.33744	4.33744
	100	0	-6.01981	-3.00991	3.00991	3.00991
	110	0	-7.56269	-3.78134	3.78134	3.78134
	120	0	-8.14529	-4.07264	4.07264	4.07264
	130	0	-11.2787	-5.63937	5.63937	5.63937
	140	0	-8.14635	-4.07318	4.07318	4.07318
	150	0	-5.53859	-2.76929	2.76929	2.76929
	160	0	-6.86054	-3.43027	3.43027	3.43027
	170	0	-9.37808	-4.68904	4.68904	4.68904
	180	0	-11.763	-5.88149	5.88149	5.88149
	190	0	-7.9354	-3.9677	3.9677	3.9677
	200	0	-9.99838	-4.99919	4.99919	4.99919
	210	0	-8.96736	-4.48368	4.48368	4.48368
	220	0	-6.96732	-3.48366	3.48366	3.48366
	230	0	-6.50996	-3.25498	3.25498	3.25498
	240	0	-8.79018	-4.39509	4.39509	4.39509
	250	0	-13.4898	-6.74491	6.74491	6.74491
	260	0	-6.35314	-3.17657	3.17657	3.17657
	270	0	0	0	0	0
	280	0	0	0	0	0
	290	0	0	0	0	0
	300	0	0	0	0	0
	310	0	0	0	0	0
	320	0	0	0	0	0
	330	0	0	0	0	0
	340	0	0	0	0	0
	350	0	0	0	0	0
	360	0	0	0	0	0
	370	0	0	0	0	0
	380	0	0	0	0	0
	390	0	0	0	0	0
	400	0	0	0	0	0
	410	0	0	0	0	0
	420	0	0	0	0	0
	430	0	0	0	0	0
	440	0	0	0	0	0
	450	0	0	0	0	0
	460	0	0	0	0	0
	470	0	0	0	0	0
	480	0	0	0	0	0
