# Supplementary material for: Conditional deletion of neurexins dysregulates neurotransmission from dopamine neurons
Source: eLife. 2023 Jul 6;12:e87902. doi: 10.7554/eLife.87902 (PMC10409506; doi:10.7554/eLife.87902)
Supplement: Figure 6—source data 1. [file elife-87902-fig6-data1.xlsx]

## Sheet: Figure 6 (F)
	Ducrot et al., 2023
	eLife
	Conditional deletion of neurexins dysregulates neurotransmission from dopamine neurons
	Raw Data
	Figure 6A. Raw data for oEPSC amplitude in ventral striatum of WT and KO mice								Figure 6B. Raw data for oEPSC amplitude in dorsal striatum WT and KO mice
		WT	KO							WT	KO
	Amplitude	pA	pA						Amplitude	pA	pA
	SEM	4.67134	6.72868						SEM	3.01139	1.98811
	Average	20.019	22.1692						Average	16.7206	15.8595
		13.4158	12.0366							14.7279	15.1172
		10.5255	17.6975							16.2769	13.6574
		10.2496	13.9596							12.4223	12.2865
		13.1654	8.52682							8.07876	17.8774
		9.89032	11.8316							6.88524	12.4616
		8.50575	12.6512							40.685	12.6474
		23.3975	11.5989							21.6472	11.5728
		6.48933	16.5722							18.2995	6.87561
		29.3341	12.5284							15.9916	14.2097
		41.7774	9.04554							12.1913	34.5299
		13.7673	94.4619								19.2489
		59.7102	50.8413								19.8294
			16.4484
		Statistical test: Mann-Whitney Test								Statistical test: Mann-Whitney Test
		P value	0.7558							P value	0.9094
		P value summary	ns							P value summary	ns
