# Supplementary material for: Conditional deletion of neurexins dysregulates neurotransmission from dopamine neurons
Source: eLife. 2023 Jul 6;12:e87902. doi: 10.7554/eLife.87902 (PMC10409506; doi:10.7554/eLife.87902)
Supplement: Figure 7—source data 1. [file elife-87902-fig7-data1.xlsx]

## Sheet: Figure (7)
Ducrot et al., 2023
eLife
Conditional deletion of neurexins dysregulates neurotransmission from dopamine neurons
Raw Data
							E	SNc
								WT	33.4	59.6	80.9	60	62	83.7	38	94.6	79	85	89.6	94	94.5	49	39.2	34	31	66.9	69
								KO	95.5	77.2	96.1	65.6	75.3	76.9	76.8	70.4	73.3	74	96.4	84	52.8	95.9	86	77.8	48.6	60.2
								VTA
								WT	32.2	64.7	12.3	20.7	30.4	66.5	13.3	32.6	27.5	70.5	60.8	13.1	5	13.9	21.1	12.9	8.2	29.1	10.7	23.6	45.5	6
								KO	62	59.2	25.5	67.5	51.5	23.3	57.4	23.1	59.1	88.9	27.3	88.8	85.9	7.6	28.9	39	12.7	8.1	46.2	7.2	4.9

## Sheet: Figure 7-Fig. suppl 1 (F)
Ducrot et al., 2023
eLife
Conditional deletion of neurexins dysregulates neurotransmission from dopamine neurons
Raw Data
				A-Dorsal	Gephyrin		Collybistin		GABA-R1		NL1		NL2		NL3		LPHN1		LPHN2		LPHN3		LRRTM1		LRRTM2		LRRTM3		LRRTM4		DR1		DR2
					WT	KO	WT	KO	WT	KO	WT	KO	WT	KO	WT	KO	WT	KO	WT	KO	WT	KO	WT	KO	WT	KO	WT	KO	WT	KO	WT	KO	WT	KO
					0.940357	0.963351	1.00354	0.707702	1.09518	0.984123	1.29298	0.988289	1.07369	0.865154	0.969659	0.954882	0.947236	0.968586	0.99005	1.06282	1.12038	0.947292	1.07626	0.974885	1.07626	0.974885	0.942876	0.859147	0.961655	0.964042	0.815928	0.906834	0.897315	0.90619
					1.00473	0.952411	0.814611	0.778371	1.18994	1.05535	0.624749	1.04447	0.938617	1.13887	0.978255	1.16213	0.845203	1.00037	0.953973	0.864286	0.913962	0.972253	0.96085	0.953712	0.96085	0.953712	0.95209	0.817802	0.774143	1.10932	0.954156	0.849282	0.802345	0.827631
					0.973654	0.976131	1.12109	0.882364	0.86798	1.12867	1.05534	0.788015	1.04301	1.04076	0.997731	0.896321	1.19764	0.77556	1.07188	0.810194	0.933034	0.995847	1.04055	0.948909	1.04055	0.948909	0.906823	0.804968	1.05388	1.12317	1.05652	0.941812	1.29997	0.659414
					1.07164	0.915546	1.00843	0.845358	0.858031	1.45285	1.20324	0.989068	0.990425	0.998596	0.988876	0.988478	1.13265	0.934892	1.01311	1.02009	0.998375	0.931089	0.999862	1.10685	0.999862	1.10685	1.03322	0.755216	1.13756	0.980707	1.03624	0.829277	1.02331	0.719802
					1.01439		1.082		1.03033		0.974891		0.960556		1.0685		0.920781		0.975003		1.04837		0.929444		0.929444		1.18892		1.12045		1.17326		1.04413
				B-Ventral	Gephyrin		Collybistin		GABA-R1		NL1		NL2		NL3		LPHN1		LPHN2		LPHN3		LRRTM1		LRRTM2		LRRTM3		LRRTM4		DR1		DR2
					WT	KO	WT	KO	WT	KO	WT	KO	WT	KO	WT	KO	WT	KO	WT	KO	WT	KO	WT	KO	WT	KO	WT	KO	WT	KO	WT	KO	WT	KO
					0.995325	0.8891	1.07058	0.956294	1.08346	1.03184	0.733202	0.70803	1.06266	0.984249	1.07196	0.955415	1.03816	1.04883	0.963508	1.16205	0.97195	0.955749	1.042	1.149	0.92299	0.815433	0.918915	0.860987	1.07372	0.91503	0.878079	1.00148	0.980751	1.13446
					0.986257	0.962836	1.00238	1.01164	1.01523	1.0485	0.792015	0.772659	1.01601	1.09086	0.885343	0.976639	0.944882	1.12518	0.860611	1.23857	0.842527	0.931389	1.431	1.004	0.883788	0.824546	0.761414	0.886151	0.846008	0.965108	0.798164	0.868271	0.833156	1.13313
					1.01934	1.04985	0.981096	1.41596	0.769656	1.15812	0.873216	0.085707	1.27725	1.00031	1.01739	1.00259	1.12497	0.799801	0.95715	1.5688	0.94392	1.66894	1.081	1.633	0.867891	2.16128	0.842393	1.88	0.93525	2.04464	1.05194	2.21208	1.15534	1.52779
					1.11539	1.03649	1.23268	0.841545	1.16183	0.607436	1.09155	0.499841	0.895227	1.21233	1.0059	1.12685	0.947736	0.976392	1.31885	1.14172	1.32637	0.981886	1.148	1.215	1.45057	0.94928	1.28904	0.947872	1.73188	0.909222	1.41275	1.12099	0.993469	1.10262
					0.895979	0.772127	0.770523	0.824882	1.01668	0.803878	1.80666		0.810027	0.78117	1.0296	0.958997	0.956158	0.909825	0.955351	1.21706	0.975375	0.72731	0.54	1.099	0.973755	0.724617	1.31621	0.721034	0.679655	0.944181	0.960104	0.792447	1.06623	1.08972
